# Supplementary material for: Clarification of Taxonomic Status within the Pseudomonas syringae Species Group Based on a Phylogenomic Analysis
Source: Front Microbiol. 2017 Dec 7;8:2422. doi: 10.3389/fmicb.2017.02422 (PMC5725466; doi:10.3389/fmicb.2017.02422)
Supplement: Supplementary file 18 [file Table3.XLSX]

## Sheet: GrI_GGDC&ANIb
Supplemental Table S3. GGDC and ANIb pairwise comparisons for the phylogenomic branches. Each square indicates a phylogenomic species.
GGDC - Formule 2 - 15 genomes	P. congelans DSM 14939T	P. congelans ICMP 19117T	P. syringae pv. syringae 642	P. syringae pv. aptata DSM 50252	P. syringae pv. syringae CRAFRU11	P. syringae DSM 10604T	P. syringae pv. pisi 1704B	P. syringae pv. panici LMG 2367	P. syringae pv. japonica M301072	P. syringae pv. avellanae ISPaVe013	P. syringae pv. coryli NCPPB 4273	P. syringae pv. syringae CRAFRU12	P. cerasi 58T	P. syringae pv. syringae B728a	P. syringae pv. aceris M302273
P. congelans DSM 14939T	100	99.9	87.8	58	57.2	56.6	58.5	56.7	58	58.6	58	57.4	54.9	56.2	56.3
P. congelans ICMP 19117T	99.9	100	87.7	57.9	57	56.4	58.4	56.5	57.9	58.5	57.7	57.2	54.8	56	56.1
P. syringae pv. syringae 642	87.8	87.7	100	58	57.5	56.9	58.3	57	57.7	58.7	58.3	58	55.6	56.3	56.2
P. syringae pv. aptata DSM 50252	58	57.9	58	100	88.9	84.8	84.2	86	85.1	70.8	70.4	70.6	59.6	61.7	62.2
P. syringae pv. syringae CRAFRU11	57.2	57	57.5	88.9	100	84.3	83.5	84.6	84.8	70.3	70	69.4	58.6	60.9	61.5
P. syringae DSM 10604T	56.6	56.4	56.9	84.8	84.3	100	83	82.8	84.1	70	69.5	68.6	58.1	60.2	61.1
P. syringae pv. pisi 1704B	58.5	58.4	58.3	84.2	83.5	83	100	82.1	82.2	70.6	70.5	70.7	59.8	61.9	61.7
P. syringae pv. panici LMG 2367	56.7	56.5	57	86	84.6	82.8	82.1	100	87.5	69.9	68.8	68.4	58.1	60.6	61
P. syringae pv. japonica M301072	58	57.9	57.7	85.1	84.8	84.1	82.2	87.5	100	70.2	69.7	70.2	59.5	61.5	61.2
P. syringae pv. avellanae ISPaVe013	58.6	58.5	58.7	70.8	70.3	70	70.6	69.9	70.2	100	83.9	83.7	61	62.6	62.8
P. syringae pv. coryli NCPPB 4273	58	57.7	58.3	70.4	70	69.5	70.5	68.8	69.7	83.9	100	84	61.2	61.8	62.4
P. syringae pv. syringae CRAFRU12	57.4	57.2	58	70.6	69.4	68.6	70.7	68.4	70.2	83.7	84	100	61.1	62.3	62.7
P. cerasi 58T	54.9	54.8	55.6	59.6	58.6	58.1	59.8	58.1	59.5	61	61.2	61.1	100	57	58
P. syringae pv. syringae B728a	56.2	56	56.3	61.7	60.9	60.2	61.9	60.6	61.5	62.6	61.8	62.3	57	100	87.6
P. syringae pv. aceris M302273	56.3	56.1	56.2	62.2	61.5	61.1	61.7	61	61.2	62.8	62.4	62.7	58	87.6	100
ANIb - 15 genomes	P. congelans DSM 14939T	P. congelans ICMP 19117T	P. syringae pv. syringae 642	P. syringae pv. aptata DSM 50252	P. syringae pv. syringae CRAFRU11	P. syringae DSM 10604T	P. syringae pv. pisi 1704B	P. syringae pv. panici LMG 2367	P. syringae pv. japonica M301072	P. syringae pv. avellanae ISPaVe013	P. syringae pv. coryli NCPPB 4273	P. syringae pv. syringae CRAFRU12	P. cerasi 58T	P. syringae pv. syringae B728a	P. syringae pv. aceris M302273
P. congelans DSM 14939T	100	99.97	98.43	94.04	94.16	94.05	93.72	94.17	94.1	94.07	94.04	94.29	93.52	94.08	93.75
P. congelans ICMP 19117T	99.98	100	98.42	94.03	94.16	94.04	93.67	94.19	94.08	94.07	94.06	94.32	93.47	94.01	93.69
P. syringae pv. syringae 642	98.44	98.41	100	93.91	94.11	94.01	93.52	93.98	93.85	93.92	94.05	94.22	93.56	93.87	93.65
P. syringae pv. aptata DSM 50252	93.74	93.7	93.47	100	98.43	97.75	96.57	98.06	97.72	95.1	95.16	95.74	93.46	94.64	94.19
P. syringae pv. syringae CRAFRU11	94.05	94.01	93.95	98.36	100	98.16	97.18	98.18	97.91	95.73	95.88	96.06	94.12	94.94	94.64
P. syringae DSM 10604T	93.96	93.9	93.88	97.77	98.13	100	97.17	97.94	97.77	95.72	95.82	95.96	94.08	94.78	94.71
P. syringae pv. pisi 1704B	93.92	93.88	93.9	97.72	97.45	97.39	100	97.34	97.25	95.8	96.09	96.11	94.26	94.66	94.53
P. syringae pv. panici LMG 2367	93.8	93.76	93.57	97.66	97.83	97.62	96.83	100	98.09	95.35	95.4	95.7	93.82	94.76	94.37
P. syringae pv. japonica M301072	93.24	93.15	93.03	97.21	97.27	97.06	96.08	98.15	100	94.8	94.79	95.2	93.11	94.12	93.58
P. syringae pv. avellanae ISPaVe013	94.19	94.12	94.17	96.14	95.97	95.94	95.7	95.91	95.91	100	97.99	97.96	94.79	95.08	94.81
P. syringae pv. coryli NCPPB 4273	94.14	94.08	94.07	96.06	96.03	95.96	95.81	95.88	95.77	97.8	100	97.84	94.77	95	94.81
P. syringae pv. syringae CRAFRU12	94.23	94.21	94.15	96.05	96.05	96.01	95.56	96.03	95.9	97.58	97.73	100	94.66	95.21	94.92
P. cerasi 58T	93.76	93.72	93.87	94.54	94.56	94.45	94.36	94.5	94.43	94.91	94.99	95.07	100	94.27	94.19
P. syringae pv. syringae B728a	93.92	93.87	93.75	94.75	94.9	94.74	94.36	95.01	94.77	94.79	94.74	95.15	93.91	100	98.27
P. syringae pv. aceris M302273	93.52	93.48	93.41	94.63	94.57	94.62	94.03	94.57	94.27	94.27	94.46	94.91	93.57	98.2	100

## Sheet: GrII_GGDC&ANIb
Supplemental Table S3. GGDC and ANIb pairwise comparisons for the phylogenomic branches. Each square indicates a phylogenomic species.
GGDC - Formule 2 - 20 genomes	P. amygdali pv. lachrymans 3988	P. amygdali pv. lachrymans M302278	P. syringae pv. tomato DC3000	P. syringae pv. tomato K40	P. syringae pv. tomato Max13	P. syringae pv. tomato T1	P. syringae pv. tomato NCPPB 1108	P. avellanae CRAFRUec1	P. avellanae CRAFRUed2	P. avellanae CRAFRUee3	P. avellanae PaVt10	P. avellanae BPIC 631T	P. syringae pv. actinidae CRAFRU8.43	P. syringae pv. actinidae M302091	P. syringae pv. actinidae NCPPB 3739	P. syringae pv. actinidae NCPPB 3871	P. syringae pv. theae NCPPB 2598	P. syringae pv. actinidae ICMP 18804	P. syringae pv. actinidae ICMP 19096	P. amygdali pv. morsprunorum M302280
P. amygdali pv. lachrymans 3988	100	99.8	94.1	89.4	89.7	89.8	90.3	64.6	64.3	64.4	64.1	64.6	63.1	63.2	63.2	63.1	62.8	62.2	59.8	64.4
P. amygdali pv. lachrymans M302278	99.8	100	94.5	90	90.3	90.4	90.7	64.9	64.8	64.8	64.7	65	63.6	63.8	63.8	63.8	63.3	62.8	60.3	64.8
P. syringae pv. tomato DC3000	94.1	94.5	100	89.6	89	89.3	89.8	64.2	63.9	64	64	64.7	63.5	63.2	62.8	63.1	63.3	62.1	59.5	64.4
P. syringae pv. tomato K40	89.4	90	89.6	100	99	98.8	98.9	64.5	64.3	64.3	64.2	64.5	63	63.3	63.1	63	63.1	62.2	59.2	64.5
P. syringae pv. tomato Max13	89.7	90.3	89	99	100	98.9	98.4	64.5	64.1	64.2	64.1	64.5	63.1	63.3	63.1	63	63	62.1	59.5	64.7
P. syringae pv. tomato T1	89.8	90.4	89.3	98.8	98.9	100	98.6	64.6	64.2	64.2	64.2	64.4	62.8	63.2	62.9	62.8	63	61.9	58.8	64.4
P. syringae pv. tomato NCPPB 1108	90.3	90.7	89.8	98.9	98.4	98.6	100	64.2	64.2	64.2	63.9	64.2	62.9	63.4	63.2	63.2	62.8	62	59	64.2
P. avellanae CRAFRUec1	64.6	64.9	64.2	64.5	64.5	64.6	64.2	100	99.9	99.9	99.7	99.4	78.8	79.8	79.7	79.6	79.1	77.3	73.5	80.3
P. avellanae CRAFRUed2	64.3	64.8	63.9	64.3	64.1	64.2	64.2	99.9	100	100	99.6	99.1	78.6	79.5	79.2	79	78.6	77.2	73.5	80.3
P. avellanae CRAFRUee3	64.4	64.8	64	64.3	64.2	64.2	64.2	99.9	100	100	99.6	99.1	78.7	79.5	79.2	79.1	78.6	77.4	73.6	80.3
P. avellanae PaVt10	64.1	64.7	64	64.2	64.1	64.2	63.9	99.7	99.6	99.6	100	99.2	78.2	79.3	79.3	79	78.5	76.7	73.2	79.8
P. avellanae BPIC 631T	64.6	65	64.7	64.5	64.5	64.4	64.2	99.4	99.1	99.1	99.2	100	79.2	79.9	79.5	79.4	79	77.7	74.3	80.4
P. syringae pv. actinidae CRAFRU8.43	63.1	63.6	63.5	63	63.1	62.8	62.9	78.8	78.6	78.7	78.2	79.2	100	95.6	95.5	95.5	90.6	81.5	76.8	81
P. syringae pv. actinidae M302091	63.2	63.8	63.2	63.3	63.3	63.2	63.4	79.8	79.5	79.5	79.3	79.9	95.6	100	99.6	99.6	90.7	81.5	77.4	82.1
P. syringae pv. actinidae NCPPB 3739	63.2	63.8	62.8	63.1	63.1	62.9	63.2	79.7	79.2	79.2	79.3	79.5	95.5	99.6	100	99.9	90.7	81.3	77.5	82
P. syringae pv. actinidae NCPPB 3871	63.1	63.8	63.1	63	63	62.8	63.2	79.6	79	79.1	79	79.4	95.5	99.6	99.9	100	90.7	81.2	77.2	81.9
P. syringae pv. theae NCPPB 2598	62.8	63.3	63.3	63.1	63	63	62.8	79.1	78.6	78.6	78.5	79	90.6	90.7	90.7	90.7	100	81.7	78.2	81.4
P. syringae pv. actinidae ICMP 18804	62.2	62.8	62.1	62.2	62.1	61.9	62	77.3	77.2	77.4	76.7	77.7	81.5	81.5	81.3	81.2	81.7	100	94.5	79.8
P. syringae pv. actinidae ICMP 19096	59.8	60.3	59.5	59.2	59.5	58.8	59	73.5	73.5	73.6	73.2	74.3	76.8	77.4	77.5	77.2	78.2	94.5	100	75.6
P. amygdali pv. morsprunorum M302280	64.4	64.8	64.4	64.5	64.7	64.4	64.2	80.3	80.3	80.3	79.8	80.4	81	82.1	82	81.9	81.4	79.8	75.6	100
FORMULA 2: DDH estimate (GLM-based): 95.00% [93.4 - 96.3%] Probability that DDH > 70% (i.e., same species): 97.21% (via logistic regression) Probability that DDH > 79% (i.e., same subspecies): 72.82% (via logistic regression)
ANIb - 20 genomes	P. amygdali pv. lachrymans 3988	P. amygdali pv. lachrymans M302278	P. syringae pv. tomato DC3000	P. syringae pv. tomato K40	P. syringae pv. tomato Max13	P. syringae pv. tomato T1	P. syringae pv. tomato NCPPB 1108	P. avellanae CRAFRUec1	P. avellanae CRAFRUed2	P. avellanae CRAFRUee3	P. avellanae PaVt10	P. avellanae BPIC 631T	P. syringae pv. actinidae CRAFRU8.43	P. syringae pv. actinidae M302091	P. syringae pv. actinidae NCPPB 3739	P. syringae pv. actinidae NCPPB 3871	P. syringae pv. theae NCPPB 2598	P. syringae pv. actinidae ICMP 18804	P. syringae pv. actinidae ICMP 19096	P. amygdali pv. morsprunorum M302280
P. amygdali pv. lachrymans 3988	100	99.94	99.13	98.71	98.72	98.75	98.82	95.41	95.3	95.33	95.37	95.32	95.22	95.18	95.17	95.17	95.08	94.81	94.72	95.35
P. amygdali pv. lachrymans M302278	99.94	100	99.08	98.61	98.62	98.66	98.74	95.34	95.22	95.22	95.34	95.26	95.12	95.09	95.09	95.07	94.95	94.67	94.71	95.26
P. syringae pv. tomato DC3000	99.04	99	100	98.41	98.41	98.43	98.54	95.21	95.13	95.19	95.2	95.02	94.86	94.87	94.85	94.88	94.79	94.73	94.71	95.04
P. syringae pv. tomato K40	98.59	98.58	98.62	100	99.72	99.81	99.7	95.22	95.14	95.14	95.21	95.12	94.91	95.02	95.04	95.05	94.98	94.75	94.32	95.24
P. syringae pv. tomato Max13	98.64	98.65	98.7	99.81	100	99.83	99.65	95.3	95.18	95.21	95.29	95.19	95.05	95.1	95.13	95.12	94.99	94.71	94.49	95.36
P. syringae pv. tomato T1	98.69	98.69	98.69	99.81	99.76	100	99.73	95.19	95.12	95.15	95.24	95.12	95.1	95.09	95.12	95.1	95.05	94.75	94.37	95.29
P. syringae pv. tomato NCPPB 1108	98.67	98.68	98.69	99.71	99.59	99.69	100	95.22	95.28	95.28	95.22	95.21	94.94	95.09	95.06	95.06	95.01	94.69	94.3	95.23
P. avellanae CRAFRUec1	95.34	95.37	95.35	95.26	95.26	95.26	95.28	100	99.85	99.86	99.96	99.74	97.26	97.46	97.46	97.44	97.36	97.1	96.83	97.39
P. avellanae CRAFRUed2	95.35	95.37	95.38	95.31	95.31	95.33	95.39	99.96	100	99.99	99.96	99.79	97.39	97.43	97.43	97.41	97.35	97.09	96.97	97.46
P. avellanae CRAFRUee3	95.32	95.35	95.35	95.28	95.29	95.3	95.37	99.95	99.96	100	99.93	99.77	97.39	97.39	97.41	97.39	97.31	97.09	96.97	97.43
P. avellanae PaVt10	95.32	95.36	95.29	95.23	95.24	95.26	95.25	99.93	99.81	99.82	100	99.71	97.22	97.45	97.46	97.44	97.32	97.11	96.78	97.33
P. avellanae BPIC 631T	95.31	95.29	95.25	95.26	95.3	95.28	95.3	99.76	99.72	99.73	99.79	100	97.27	97.28	97.27	97.27	97.27	97.07	97	97.34
P. syringae pv. actinidae CRAFRU8.43	95.1	95.08	95.09	94.98	94.99	95.03	94.99	97.19	97.23	97.24	97.18	97.2	100	99.28	99.29	99.26	98.61	97.66	97.22	97.37
P. syringae pv. actinidae M302091	95.12	95.12	95.13	95.08	95.11	95.14	95.18	97.41	97.29	97.33	97.39	97.33	99.28	100	99.88	99.86	98.59	97.53	97.45	97.49
P. syringae pv. actinidae NCPPB 3739	95.17	95.19	95.11	95.15	95.12	95.15	95.19	97.49	97.38	97.41	97.44	97.37	99.33	99.87	100	99.97	98.73	97.55	97.44	97.55
P. syringae pv. actinidae NCPPB 3871	95.24	95.28	95.19	95.19	95.18	95.2	95.25	97.5	97.42	97.43	97.46	97.41	99.36	99.9	99.98	100	98.72	97.61	97.49	97.61
P. syringae pv. theae NCPPB 2598	94.97	94.99	95.09	95.01	94.98	95.05	95	97.22	97.16	97.19	97.22	97.23	98.57	98.5	98.55	98.57	100	97.61	97.5	97.23
P. syringae pv. actinidae ICMP 18804	95	95.05	95.05	94.87	94.89	94.83	94.9	97.14	97.11	97.19	97.12	97.11	97.71	97.62	97.68	97.64	97.74	100	99.35	97.25
P. syringae pv. actinidae ICMP 19096	94.85	94.87	94.92	94.66	94.69	94.63	94.68	96.86	96.88	96.95	96.85	96.96	97.4	97.41	97.42	97.41	97.55	99.21	100	96.99
P. amygdali pv. morsprunorum M302280	95.17	95.16	95.07	95.14	95.17	95.11	95.14	97.22	97.19	97.23	97.2	97.15	97.23	97.25	97.25	97.24	97.3	96.76	96.66	100

## Sheet: GrIII_GGDC&ANIb
Supplemental Table S3. GGDC and ANIb pairwise comparisons for the phylogenomic branches. Each square indicates a phylogenomic species.
GGDC - Formule 2 - 17 genomes	P. cannabina ICMP 2823T	P. cannabina ICMP 2823T	P. syringae pv. alisalensis ICMP 15200	P. syringae pv. coriandricola ICMP 12471	P. syringae CC1583	P. viridiflava ICMP 13104	'P. coronafaciens' pv. atropurpurea ICMP 4457	'P. coronafaciens' pv. porri LMG 28495	'P. coronafaciens' pv. porri ICMP 8961	'P. coronafaciens' pv. porri LMG 28496	'P. coronafaciens' LMG 5060	'P. coronafaciens' pv. oryzae 36_1	'P. coronafaciens' pv. oryzae ICMP 9088	'P. coronafaciens' pv. zizaniae ICMP8921	'P. coronafaciens' pv. garcae ICMP 4323	'P. coronafaciens' pv. oryzae 1_6	P. tremae ICMP 9151T
P. cannabina ICMP 2823T	100	70.9	81.1	62.6	38.7	38.7	30.4	31.3	31.4	31.6	32.7	30.2	30.1	30.7	30.3	31.1	30.8
P. cannabina ICMP 2823T	70.9	100	80.7	62.5	38.8	38.7	30.4	31.8	31.8	32.3	32.9	30.2	30.2	31	30.3	31.1	31.5
P. syringae pv. alisalensis ICMP 15200	81.1	80.7	100	62.8	38.8	38.8	30.3	31.1	31.1	31.3	32.9	30.1	30.1	30.7	30.2	31.3	30.8
P. syringae pv. coriandricola ICMP 12471	62.6	62.5	62.8	100	38.8	38.8	30	30.6	30.6	30.7	32.1	30	30	30.3	30	30.6	30.4
P. syringae CC1583	38.7	38.8	38.8	38.8	100	90.9	30.3	30.4	30.4	30.4	31.9	30.4	30.4	30.4	30.4	31	30.4
P. viridiflava ICMP 13104	38.7	38.7	38.8	38.8	90.9	100	30.7	30.6	30.6	30.6	32	30.6	30.6	30.6	30.6	31.3	30.6
'P. coronafaciens' pv. atropurpurea ICMP 4457	30.4	30.4	30.3	30	30.3	30.7	100	87	87.4	86.6	88.1	89.5	89.6	88.1	89.6	88.8	87.7
'P. coronafaciens' pv. porri LMG 28495	31.3	31.8	31.1	30.6	30.4	30.6	87	100	99.9	98.8	92.6	93.2	93.2	92.5	92.6	92	92.7
'P. coronafaciens' pv. porri ICMP 8961	31.4	31.8	31.1	30.6	30.4	30.6	87.4	99.9	100	99	92.6	93.3	93.4	92.5	92.8	92.3	93
'P. coronafaciens' pv. porri LMG 28496	31.6	32.3	31.3	30.7	30.4	30.6	86.6	98.8	99	100	92.1	92.7	92.7	92	92.1	91.7	92.2
'P. coronafaciens' LMG 5060	32.7	32.9	32.9	32.1	31.9	32	88.1	92.6	92.6	92.1	100	93.8	93.8	93.3	93.4	93	93.1
'P. coronafaciens' pv. oryzae 36_1	30.2	30.2	30.1	30	30.4	30.6	89.5	93.2	93.3	92.7	93.8	100	99.9	93.4	94.2	75.4	93.2
'P. coronafaciens' pv. oryzae ICMP 9088	30.1	30.2	30.1	30	30.4	30.6	89.6	93.2	93.4	92.7	93.8	99.9	100	93.3	94.3	74	93.3
'P. coronafaciens' pv. zizaniae ICMP8921	30.7	31	30.7	30.3	30.4	30.6	88.1	92.5	92.5	92	93.3	93.4	93.3	100	95	92.4	92.9
'P. coronafaciens' pv. garcae ICMP 4323	30.3	30.3	30.2	30	30.4	30.6	89.6	92.6	92.8	92.1	93.4	94.2	94.3	95	100	83	93.5
'P. coronafaciens' pv. oryzae 1_6	31.1	31.1	31.3	30.6	31	31.3	88.8	92	92.3	91.7	93	75.4	74	92.4	83	100	93.2
P. tremae ICMP 9151T	30.8	31.5	30.8	30.4	30.4	30.6	87.7	92.7	93	92.2	93.1	93.2	93.3	92.9	93.5	93.2	100
FORMULA 2: DDH estimate (GLM-based): 95.00% [93.4 - 96.3%] Probability that DDH > 70% (i.e., same species): 97.21% (via logistic regression) Probability that DDH > 79% (i.e., same subspecies): 72.82% (via logistic regression)
ANIb - 17 genomes	P. cannabina ICMP 2823T	P. cannabina ICMP 2823T	P. syringae pv. alisalensis ICMP 15200	P. syringae pv. coriandricola ICMP 12471	P. syringae CC1583	P. viridiflava ICMP 13104	'P. coronafaciens' pv. atropurpurea ICMP 4457	'P. coronafaciens' pv. porri LMG 28495	'P. coronafaciens' pv. porri ICMP 8961	'P. coronafaciens' pv. porri LMG 28496	'P. coronafaciens' LMG 5060	'P. coronafaciens' pv. oryzae 36_1	'P. coronafaciens' pv. oryzae ICMP 9088	'P. coronafaciens' pv. zizaniae ICMP8921	'P. coronafaciens' pv. garcae ICMP 4323	'P. coronafaciens' pv. oryzae 1_6	P. tremae ICMP 9151T
P. cannabina ICMP 2823T	100	99.96	97.65	94.99	89.43	89.35	85.34	85.96	85.96	86.03	85.86	85.25	85.24	85.58	85.32	85.34	85.64
P. cannabina ICMP 2823T	99.9	100	97.49	95.05	89.53	89.46	85.27	86.19	86.13	86.45	85.67	85.29	85.27	86.07	85.37	85.4	86.08
P. syringae pv. alisalensis ICMP 15200	97.6	97.58	100	95.03	89.34	89.25	85.2	85.64	85.6	85.72	85.8	85.15	85.15	85.45	85.26	85.37	85.49
P. syringae pv. coriandricola ICMP 12471	95.1	95.12	95.17	100	89.37	89.35	85.13	85.59	85.59	85.66	85.71	85.17	85.17	85.54	85.19	85.15	85.56
P. syringae CC1583	89.44	89.45	89.43	89.34	100	98.9	85.67	85.63	85.64	85.62	85.67	85.72	85.71	85.63	85.71	85.68	85.6
P. viridiflava ICMP 13104	89.31	89.31	89.34	89.28	98.91	100	85.6	85.48	85.45	85.47	85.62	85.6	85.58	85.48	85.56	85.58	85.47
'P. coronafaciens' pv. atropurpurea ICMP 4457	85.14	85.17	85.17	85.08	85.54	85.58	100	98.42	98.44	98.34	98.43	98.65	98.66	98.49	98.68	98.5	98.47
'P. coronafaciens' pv. porri LMG 28495	85.71	85.76	85.68	85.4	85.49	85.43	98.14	100	99.94	99.78	98.78	98.91	98.93	98.84	98.85	98.62	98.94
'P. coronafaciens' pv. porri ICMP 8961	85.65	85.69	85.63	85.4	85.48	85.42	98.17	99.95	100	99.81	98.79	98.94	98.95	98.83	98.88	98.68	98.95
'P. coronafaciens' pv. porri LMG 28496	85.86	85.91	85.8	85.46	85.5	85.46	98.02	99.7	99.72	100	98.7	98.76	98.78	98.72	98.69	98.52	98.78
'P. coronafaciens' LMG 5060	85.69	85.7	85.81	85.44	85.7	85.74	98.4	98.96	98.96	98.91	100	99.05	99.04	99.07	99.08	98.95	99.08
'P. coronafaciens' pv. oryzae 36_1	85.18	85.17	85.2	85.18	85.61	85.54	98.73	99.12	99.12	99.07	99.11	100	99.98	99.12	99.23	99.25	99.09
'P. coronafaciens' pv. oryzae ICMP 9088	85.26	85.24	85.22	85.21	85.67	85.62	98.72	99.07	99.08	99.03	99.11	99.94	100	99.11	99.23	99.18	99.08
'P. coronafaciens' pv. zizaniae ICMP8921	85.43	85.46	85.51	85.32	85.57	85.5	98.38	98.97	98.98	98.94	98.99	98.97	98.98	100	99.17	98.87	98.98
'P. coronafaciens' pv. garcae ICMP 4323	85.28	85.32	85.28	85.17	85.66	85.58	98.69	99.02	99.06	99	99.07	99.19	99.21	99.3	100	99.19	99.1
'P. coronafaciens' pv. oryzae 1_6	85.6	85.61	85.75	85.48	85.77	85.83	98.13	98.51	98.52	98.51	98.5	98.64	98.71	98.63	98.65	100	98.71
P. tremae ICMP 9151T	85.28	85.32	85.43	85.22	85.4	85.38	97.68	98.3	98.33	98.25	98.25	98.24	98.26	98.28	98.32	98.21	100

## Sheet: GrIV_GGDC&ANIb
Supplemental Table S3. GGDC and ANIb pairwise comparisons for the phylogenomic branches. Each square indicates a phylogenomic species.
GGD - Formule 2 - 60 genomes	P. amygdali pv. aesculi 0893_23	P. amygdali pv. aesculi NCPPB 3681	P. amygdali pv. aesculi 2250	P. amygdali pv. aesculi ICMP 8947	P. amygdali pv. ulmi ICMP 3962	P. amygdali pv. morsprunorumFTRS_U7805	P. meliae lCFBP 3225T	P. meliae ICMP 6289T	P. amygdali pv. dendropanacis CFBP 4219	P. amygdali pv. myricaeAZ84488	P. amygdali pv. myricae ICMP 7118	P. amygdali pv. dendropanacis CFBP 3226	P. amygdali pv. dendropanacis ICMP 9150	P. amygdali CFBP 3205T	P. amygdali pv. ciccaronei ICMP 5710	P. savastanoi ICMP 16945	P. savastanoi 4352	P. savastanoi ICMP 4352T	P. savastanoi PseNe107	P. savastanoi ICMP 16943	P. savastanoi pv. savastanoi NCPPB 3335	P. savastanoi DAPPPG722	P. amygdali pv. photiniaeICMP 7840	P. amygdali pv. eriobotryaeICMP 4455	P. amygdali pv. lachrymans 107	P. amygdali pv. lachrymans 98A-744	P. amygdali pv. lachrymans YM7902	P. amygdali pv. tabaci 6605	P. amygdali pv. tabaci ICMP 2835	P. amygdali pv. tabaci yuexi-1	P. amygdali pv. lachrymans ICMP 3507	P. amygdali pv. tabaci ATCC 11528	P. amygdali pv. tabaci ATCC11528	P. amygdali pv. hibisci ICMP 9623	P. amygdali pv. sesami HC_1	P. amygdali pv. sesami ICMP 763	P. amygdali pv. melleaN6801	P. savastanoi 1302	P. savastanoi pv. phaseolicola 1448A	P. savastanoi pv. phaseolicola HB10	P. savastanoi pv. phaseolicola NPS3121	P. savastanoi pv. phaseolicola ICMP2740LJQZ01	P. savastanoi pv. phaseolicola Y5_2	P. savastanoi pv. phaseolicola 1644R	P. savastanoi pv. glycinea B076	P. savastanoi pv. glycinea BR1	P. savastanoi pv. glycinea LN10	P. savastanoi pv. glycinea KN44	P. savastanoi pv. glycinea UnB647
P. amygdali pv. aesculi 0893_23	100	96	99	97.9	97.1	90.4	89.9	89.6	87.4	87.5	87.2	87.5	87.2	87.3	87.4	87.2	87.9	87.8	87.8	87.8	87.7	87.3	87.4	86.1	81.7	81.5	81.8	81.3	81.1	81.2	78.5	81.5	81.1	81.3	81.1	80.4	80.6	80.5	81.3	81.3	81.5	80.8	81.7	81.5	81.2	81.5	81.7	81.5	81.4
P. amygdali pv. aesculi NCPPB 3681	96	100	98.8	97.8	96.8	90	89.5	89.2	87.1	87.2	86.9	87.1	86.8	87	87	86.9	87.6	87.5	87.5	87.5	87.3	87	87.1	86	81.3	81.1	81.4	80.9	80.8	80.9	78.3	81.3	80.9	81	80.7	80.1	80.3	80.2	81.1	81	81.2	80.6	81.5	81.4	80.9	81.2	81.4	81.2	81.1
P. amygdali pv. aesculi 2250	99	98.8	100	96.7	96.5	89.5	89.9	89.2	87.1	87.2	86.8	87.4	87	86.8	87	87.2	87.6	87.4	87.2	87.9	87.4	86.7	86.7	85.4	80.7	80.2	80.6	81.3	81.1	81	78.2	81.2	80.9	81.2	80.8	80	80.3	80.1	81.3	80.9	81.2	80.6	81.8	81.3	80.7	81.3	81.5	81.5	81.4
P. amygdali pv. aesculi ICMP 8947	97.9	97.8	96.7	100	94.6	87.5	86.8	86.9	84.7	84.8	84.5	84.6	84.7	84.6	84.7	85.1	85.1	85.1	85	85.2	84.8	84.5	85	84.3	79.1	78.9	79.2	78.7	78.6	78.7	77.2	79.3	78.7	78.8	78.6	77.9	78.2	78.2	78.8	78.8	79.1	78.6	79.3	79.2	78.6	78.9	79.1	79.1	79
P. amygdali pv. ulmi ICMP 3962	97.1	96.8	96.5	94.6	100	89.2	88.7	88.3	86.6	86.3	86.3	86.6	86.4	86.5	86.6	85.9	86.5	86.4	86.4	87.1	86.3	85.8	86.1	84.1	80.9	80.3	80.7	81.3	81.1	80.9	78.1	81	80.5	80.8	80.5	79.8	79.7	79.6	80.5	80	80.3	80	81	80.6	80	80.4	80.7	80.5	80.4
P. amygdali pv. morsprunorumFTRS_U7805	90.4	90	89.5	87.5	89.2	100	89.7	89	87.3	87.1	87	87.5	87	86.7	86.9	86.8	87.5	87.3	86.9	87.9	87.1	86.4	86.5	84.6	81.1	80.9	81.2	81.4	81.1	81.1	78.2	81.3	81	81.4	80.3	79.8	80.1	79.9	81.2	80.4	80.7	80.2	81.4	80.8	80.2	80.5	80.7	80.9	80.6
P. meliae lCFBP 3225T	89.9	89.5	89.9	86.8	88.7	89.7	100	99.3	87	87	86.6	87.3	86.9	86.5	86.8	86.6	87.2	87.1	87.2	87.5	87.4	87	86	85.5	80.5	80	80.5	81.1	81	80.9	78.2	81.4	81	81	80.9	80.1	80.5	80.4	80.5	80.5	81	80.2	81	81.1	80	80.8	81.1	80.8	80.6
P. meliae ICMP 6289T	89.6	89.2	89.2	86.9	88.3	89	99.3	100	86.5	86.6	86.2	86.8	86.9	86.1	86.8	86.6	86.7	86.6	86.6	87.1	86.9	86.5	85.6	85.3	80.1	79.5	80.1	80.7	81	80.6	78.2	81	80.5	80.7	80.5	80	80	80	80.3	80.2	80.5	80.1	80.6	80.7	79.5	80.4	80.6	80.5	80.2
P. amygdali pv. dendropanacis CFBP 4219	87.4	87.1	87.1	84.7	86.6	87.3	87	86.5	100	90.2	90.1	90.4	90	89.1	89.1	89.1	89.6	89.5	89.4	90.1	89.5	88.6	88.7	88.4	79.6	79.1	79.6	79.8	79.3	79.9	76.8	79.8	79.2	80	80.2	79.6	79.6	79.4	80.8	80.3	80.7	80	81.3	80.9	79.6	80.3	80.5	80.5	80.2
P. amygdali pv. myricaeAZ84488	87.5	87.2	87.2	84.8	86.3	87.1	87	86.6	90.2	100	99.2	90.3	90.1	88.6	89.2	88.3	89	88.8	88.4	89.4	88.7	88	88.9	88.6	79.2	78.9	79.2	80.3	80.1	80	77.2	80.4	79.9	79.4	79.6	79.1	79.9	79.8	80.1	80	80.2	79.6	80.5	80.2	79.3	80.1	80.3	80.1	80
P. amygdali pv. myricae ICMP 7118	87.2	86.9	86.8	84.5	86.3	87	86.6	86.2	90.1	99.2	100	90.1	89.8	88.6	88.7	88.3	89.2	89.1	88.9	89.6	88.9	88.3	88.9	89	79.3	78.9	79.3	79.6	79.3	79.5	76.8	79.9	79.3	79.4	79.4	79	79.4	79.3	80.5	80.1	80.5	79.5	80.5	80.3	79.1	79.7	80	80	79.8
P. amygdali pv. dendropanacis CFBP 3226	87.5	87.1	87.4	84.6	86.6	87.5	87.3	86.8	90.4	90.3	90.1	100	98.1	89.1	89.2	89	89.5	89.3	89.7	89.9	89.5	89.2	89.4	89.2	79.7	79.2	79.6	80.3	80.2	79.9	77.5	80.4	80	79.7	80.1	79.2	80.3	80.1	80.6	80.5	80.9	80.2	80.9	81.1	79.9	80.4	80.8	80.6	80.5
P. amygdali pv. dendropanacis ICMP 9150	87.2	86.8	87	84.7	86.4	87	86.9	86.9	90	90.1	89.8	98.1	100	88.6	89.1	89.1	89.2	89	89.4	89.5	89.2	88.8	89.3	89.2	79.4	79	79.4	80	80	79.7	77.6	80.3	79.8	79.4	79.8	79.1	80	79.9	80.4	80.4	80.7	80.1	80.7	81	79.8	80.3	80.5	80.4	80.3
P. amygdali CFBP 3205T	87.3	87	86.8	84.6	86.5	86.7	86.5	86.1	89.1	88.6	88.6	89.1	88.6	100	89.7	89	89.9	89.8	89.5	90.2	89.8	89.2	88.4	87	79.2	78.9	79.1	80.5	80	80	77	80.3	79.9	79.7	79.5	78.9	79.8	79.6	80.3	79.9	80.3	79.9	81	80.9	79.8	80.3	80.5	80.3	80.1
P. amygdali pv. ciccaronei ICMP 5710	87.4	87	87	84.7	86.6	86.9	86.8	86.8	89.1	89.2	88.7	89.2	89.1	89.7	100	97.3	97.9	97.7	97.3	98	97.7	96.9	88.4	87.5	80.1	79.7	80	80.5	80.1	80.5	77.4	80.5	80	80.5	80.2	79.5	79.7	79.5	80.7	80.2	80.5	79.7	81	80.8	79.8	80.3	80.6	80.5	80.4
P. savastanoi ICMP 16945	87.2	86.9	87.2	85.1	85.9	86.8	86.6	86.6	89.1	88.3	88.3	89	89.1	89	97.3	100	97.6	97.6	97.4	97.8	97.7	96.8	88.3	87	79.7	79.2	79.6	79.9	79.7	80.1	77.3	80.7	80	79.7	79.7	79.4	79.6	79.4	79.9	79.6	79.9	79.5	80.3	80.6	79.3	79.8	80.1	79.9	79.8
P. savastanoi 4352	87.9	87.6	87.6	85.1	86.5	87.5	87.2	86.7	89.6	89	89.2	89.5	89.2	89.9	97.9	97.6	100	99.8	99.1	98.6	98.5	98.9	88.6	87	80.2	79.8	80.1	80.6	80.3	80.3	77.5	80.9	80.3	80.4	80.3	79.7	80.2	80.1	80.5	80.2	80.5	80.1	80.6	81.3	79.9	80.3	80.6	80.3	80.3
P. savastanoi ICMP 4352T	87.8	87.5	87.4	85.1	86.4	87.3	87.1	86.6	89.5	88.8	89.1	89.3	89	89.8	97.7	97.6	99.8	100	99.2	98.7	98.4	99.1	88.5	86.9	80.1	79.8	80	80.6	80.3	80.2	77.5	80.7	80.1	80.3	80.1	79.5	79.9	79.8	80.5	80	80.3	80	80.5	81.2	79.7	80.1	80.5	80.2	80.2
P. savastanoi PseNe107	87.8	87.5	87.2	85	86.4	86.9	87.2	86.6	89.4	88.4	88.9	89.7	89.4	89.5	97.3	97.4	99.1	99.2	100	98.8	98.1	99	88.2	86.7	79.8	79.4	79.7	80.3	79.8	80.4	77	80.6	79.7	79.9	79.7	79.1	79.8	79.7	80.5	79.8	80.1	79.7	80.8	80.9	79.6	80.2	80.6	80.5	80.3
P. savastanoi ICMP 16943	87.8	87.5	87.9	85.2	87.1	87.9	87.5	87.1	90.1	89.4	89.6	89.9	89.5	90.2	98	97.8	98.6	98.7	98.8	100	98.6	97.9	89.1	87.8	80.3	79.9	80.2	80.8	80.5	80.8	77.6	81.1	80.5	80.6	80.4	79.9	80.5	80.4	80.9	80.6	81	80.3	81.2	81.4	80	80.5	80.9	80.6	80.7
P. savastanoi pv. savastanoi NCPPB 3335	87.7	87.3	87.4	84.8	86.3	87.1	87.4	86.9	89.5	88.7	88.9	89.5	89.2	89.8	97.7	97.7	98.5	98.4	98.1	98.6	100	97.7	88.3	86.8	80	79.4	79.8	80.3	79.7	80.1	77.1	80.8	80	80.1	79.8	79.1	79.8	79.7	80.6	79.9	80.3	79.8	80.9	80.8	79.8	80.1	80.5	80.2	80.2
P. savastanoi DAPPPG722	87.3	87	86.7	84.5	85.8	86.4	87	86.5	88.6	88	88.3	89.2	88.8	89.2	96.9	96.8	98.9	99.1	99	97.9	97.7	100	87.2	86.1	79.4	78.9	79.3	79.5	78.9	79.7	76.4	79.8	78.8	79.4	79.3	78.6	79	78.8	80.3	79.6	79.9	79.2	80.6	80.5	79.1	79.6	80	79.9	79.7
P. amygdali pv. photiniaeICMP 7840	87.4	87.1	86.7	85	86.1	86.5	86	85.6	88.7	88.9	88.9	89.4	89.3	88.4	88.4	88.3	88.6	88.5	88.2	89.1	88.3	87.2	100	87.7	79.7	79.2	79.6	79	78.7	79.1	76.6	79.6	78.8	79.1	78.9	78.5	78.6	78.5	79.9	79.2	79.5	79.1	79.9	79.9	78.8	79	79.2	79.1	78.9
P. amygdali pv. eriobotryaeICMP 4455	86.1	86	85.4	84.3	84.1	84.6	85.5	85.3	88.4	88.6	89	89.2	89.2	87	87.5	87	87	86.9	86.7	87.8	86.8	86.1	87.7	100	78.4	78.2	78.5	78.9	78.7	78.9	76.7	79.2	78.4	78.3	78.1	77.6	78.7	78.4	79	78.4	78.6	78.6	79.3	79.4	78	78.6	78.7	78.5	78.5
P. amygdali pv. lachrymans 107	81.7	81.3	80.7	79.1	80.9	81.1	80.5	80.1	79.6	79.2	79.3	79.7	79.4	79.2	80.1	79.7	80.2	80.1	79.8	80.3	80	79.4	79.7	78.4	100	99.1	99.3	89.8	89.5	88.7	86.2	89.7	89.3	88.8	84.2	83.5	82.7	82.6	83.5	83	83.4	82.6	84.1	83.6	82.9	83.5	83.7	83.6	83.5
P. amygdali pv. lachrymans 98A-744	81.5	81.1	80.2	78.9	80.3	80.9	80	79.5	79.1	78.9	78.9	79.2	79	78.9	79.7	79.2	79.8	79.8	79.4	79.9	79.4	78.9	79.2	78.2	99.1	100	99.4	89.3	88.6	88.3	85.6	89.1	88.5	88.5	83.7	83.1	82.3	82.1	83.4	82.7	83.2	81.9	83.7	83.2	82.5	82.7	83.2	83.2	82.9
P. amygdali pv. lachrymans YM7902	81.8	81.4	80.6	79.2	80.7	81.2	80.5	80.1	79.6	79.2	79.3	79.6	79.4	79.1	80	79.6	80.1	80	79.7	80.2	79.8	79.3	79.6	78.5	99.3	99.4	100	89.3	88.9	88.4	85.7	89.5	89	88.6	83.9	83.4	82.6	82.3	83.4	83	83.3	82.3	84	83.5	82.4	83	83.3	83.4	83.1
P. amygdali pv. tabaci 6605	81.3	80.9	81.3	78.7	81.3	81.4	81.1	80.7	79.8	80.3	79.6	80.3	80	80.5	80.5	79.9	80.6	80.6	80.3	80.8	80.3	79.5	79	78.9	89.8	89.3	89.3	100	99.4	98.1	96.2	92.8	92.4	89.6	85.1	84.4	83.5	83.4	84.1	84	84.4	83	84.1	83.8	83.2	83.6	83.9	83.8	83.5
P. amygdali pv. tabaci ICMP 2835	81.1	80.8	81.1	78.6	81.1	81.1	81	81	79.3	80.1	79.3	80.2	80	80	80.1	79.7	80.3	80.3	79.8	80.5	79.7	78.9	78.7	78.7	89.5	88.6	88.9	99.4	100	97.9	96.3	92.2	91.8	89.7	84.7	84	83.3	82.9	83.9	83.6	83.9	82.5	84	83.5	82.6	83	83.3	83.5	83.3
P. amygdali pv. tabaci yuexi-1	81.2	80.9	81	78.7	80.9	81.1	80.9	80.6	79.9	80	79.5	79.9	79.7	80	80.5	80.1	80.3	80.2	80.4	80.8	80.1	79.7	79.1	78.9	88.7	88.3	88.4	98.1	97.9	100	94.4	91.4	91.2	89.3	85	84.3	82.7	82.5	83.4	83.3	83.7	82.5	83.4	83.7	83.1	83.3	83.7	83.6	83.3
P. amygdali pv. lachrymans ICMP 3507	78.5	78.3	78.2	77.2	78.1	78.2	78.2	78.2	76.8	77.2	76.8	77.5	77.6	77	77.4	77.3	77.5	77.5	77	77.6	77.1	76.4	76.6	76.7	86.2	85.6	85.7	96.2	96.3	94.4	100	89.3	88.3	85.9	81.3	80.8	80.1	79.9	80.8	80.5	80.7	79.6	80.6	81	79.8	80.2	80.4	80.6	80.3
P. amygdali pv. tabaci ATCC 11528	81.5	81.3	81.2	79.3	81	81.3	81.4	81	79.8	80.4	79.9	80.4	80.3	80.3	80.5	80.7	80.9	80.7	80.6	81.1	80.8	79.8	79.6	79.2	89.7	89.1	89.5	92.8	92.2	91.4	89.3	100	99.4	90.6	85.1	84.3	83.4	83.3	84.4	84	84.3	83.2	84.3	83.9	82.9	84.1	84.2	84.2	83.9
P. amygdali pv. tabaci ATCC11528	81.1	80.9	80.9	78.7	80.5	81	81	80.5	79.2	79.9	79.3	80	79.8	79.9	80	80	80.3	80.1	79.7	80.5	80	78.8	78.8	78.4	89.3	88.5	89	92.4	91.8	91.2	88.3	99.4	100	90.1	84.5	83.9	83.2	83	84	83.5	84	82.7	84	83.6	82.5	83.6	84	83.8	83.4
P. amygdali pv. hibisci ICMP 9623	81.3	81	81.2	78.8	80.8	81.4	81	80.7	80	79.4	79.4	79.7	79.4	79.7	80.5	79.7	80.4	80.3	79.9	80.6	80.1	79.4	79.1	78.3	88.8	88.5	88.6	89.6	89.7	89.3	85.9	90.6	90.1	100	84.7	84.2	83.6	83.4	83.6	83.5	84	82.9	83.8	83.9	83.5	84.2	84.5	84.3	84.1
P. amygdali pv. sesami HC_1	81.1	80.7	80.8	78.6	80.5	80.3	80.9	80.5	80.2	79.6	79.4	80.1	79.8	79.5	80.2	79.7	80.3	80.1	79.7	80.4	79.8	79.3	78.9	78.1	84.2	83.7	83.9	85.1	84.7	85	81.3	85.1	84.5	84.7	100	98.6	82.5	82.4	83.4	82.8	82.9	82.5	83.5	83.3	82.8	83.3	83.4	83.3	83.2
P. amygdali pv. sesami ICMP 763	80.4	80.1	80	77.9	79.8	79.8	80.1	80	79.6	79.1	79	79.2	79.1	78.9	79.5	79.4	79.7	79.5	79.1	79.9	79.1	78.6	78.5	77.6	83.5	83.1	83.4	84.4	84	84.3	80.8	84.3	83.9	84.2	98.6	100	81.9	81.8	82.8	82.2	82.5	82	83.1	82.8	82.2	82.7	82.9	82.8	82.5
P. amygdali pv. melleaN6801	80.6	80.3	80.3	78.2	79.7	80.1	80.5	80	79.6	79.9	79.4	80.3	80	79.8	79.7	79.6	80.2	79.9	79.8	80.5	79.8	79	78.6	78.7	82.7	82.3	82.6	83.5	83.3	82.7	80.1	83.4	83.2	83.6	82.5	81.9	100	99.9	99.7	99.5	99.6	98.5	98.5	96.9	93.9	94.7	94.8	95.3	94.6
P. savastanoi 1302	80.5	80.2	80.1	78.2	79.6	79.9	80.4	80	79.4	79.8	79.3	80.1	79.9	79.6	79.5	79.4	80.1	79.8	79.7	80.4	79.7	78.8	78.5	78.4	82.6	82.1	82.3	83.4	82.9	82.5	79.9	83.3	83	83.4	82.4	81.8	99.9	100	99.6	99.4	99.6	98.4	98.4	96.8	93.8	94.6	94.7	95.1	94.3
P. savastanoi pv. phaseolicola 1448A	81.3	81.1	81.3	78.8	80.5	81.2	80.5	80.3	80.8	80.1	80.5	80.6	80.4	80.3	80.7	79.9	80.5	80.5	80.5	80.9	80.6	80.3	79.9	79	83.5	83.4	83.4	84.1	83.9	83.4	80.8	84.4	84	83.6	83.4	82.8	99.7	99.6	100	99.5	99.8	99.5	98.7	97.8	95.8	95.7	96.2	95.8	95.5
P. savastanoi pv. phaseolicola HB10	81.3	81	80.9	78.8	80	80.4	80.5	80.2	80.3	80	80.1	80.5	80.4	79.9	80.2	79.6	80.2	80	79.8	80.6	79.9	79.6	79.2	78.4	83	82.7	83	84	83.6	83.3	80.5	84	83.5	83.5	82.8	82.2	99.5	99.4	99.5	100	99.8	99.2	98.7	97.5	94.4	95.1	95.4	95.4	94.8
P. savastanoi pv. phaseolicola NPS3121	81.5	81.2	81.2	79.1	80.3	80.7	81	80.5	80.7	80.2	80.5	80.9	80.7	80.3	80.5	79.9	80.5	80.3	80.1	81	80.3	79.9	79.5	78.6	83.4	83.2	83.3	84.4	83.9	83.7	80.7	84.3	84	84	82.9	82.5	99.6	99.6	99.8	99.8	100	99.3	98.8	97.6	94.7	95.7	95.7	95.8	95.3
P. savastanoi pv. phaseolicola ICMP2740LJQZ01	80.8	80.6	80.6	78.6	80	80.2	80.2	80.1	80	79.6	79.5	80.2	80.1	79.9	79.7	79.5	80.1	80	79.7	80.3	79.8	79.2	79.1	78.6	82.6	81.9	82.3	83	82.5	82.5	79.6	83.2	82.7	82.9	82.5	82	98.5	98.4	99.5	99.2	99.3	100	98.4	97	94.1	94.7	95	95	94.4
P. savastanoi pv. phaseolicola Y5_2	81.7	81.5	81.8	79.3	81	81.4	81	80.6	81.3	80.5	80.5	80.9	80.7	81	81	80.3	80.6	80.5	80.8	81.2	80.9	80.6	79.9	79.3	84.1	83.7	84	84.1	84	83.4	80.6	84.3	84	83.8	83.5	83.1	98.5	98.4	98.7	98.7	98.8	98.4	100	97.8	95.5	96.1	96.1	96	96
P. savastanoi pv. phaseolicola 1644R	81.5	81.4	81.3	79.2	80.6	80.8	81.1	80.7	80.9	80.2	80.3	81.1	81	80.9	80.8	80.6	81.3	81.2	80.9	81.4	80.8	80.5	79.9	79.4	83.6	83.2	83.5	83.8	83.5	83.7	81	83.9	83.6	83.9	83.3	82.8	96.9	96.8	97.8	97.5	97.6	97	97.8	100	95.7	96.4	96.4	96.5	96.1
P. savastanoi pv. glycinea B076	81.2	80.9	80.7	78.6	80	80.2	80	79.5	79.6	79.3	79.1	79.9	79.8	79.8	79.8	79.3	79.9	79.7	79.6	80	79.8	79.1	78.8	78	82.9	82.5	82.4	83.2	82.6	83.1	79.8	82.9	82.5	83.5	82.8	82.2	93.9	93.8	95.8	94.4	94.7	94.1	95.5	95.7	100	99.1	99.3	99.2	98.9
P. savastanoi pv. glycinea BR1	81.5	81.2	81.3	78.9	80.4	80.5	80.8	80.4	80.3	80.1	79.7	80.4	80.3	80.3	80.3	79.8	80.3	80.1	80.2	80.5	80.1	79.6	79	78.6	83.5	82.7	83	83.6	83	83.3	80.2	84.1	83.6	84.2	83.3	82.7	94.7	94.6	95.7	95.1	95.7	94.7	96.1	96.4	99.1	100	99.8	99.5	99
P. savastanoi pv. glycinea LN10	81.7	81.4	81.5	79.1	80.7	80.7	81.1	80.6	80.5	80.3	80	80.8	80.5	80.5	80.6	80.1	80.6	80.5	80.6	80.9	80.5	80	79.2	78.7	83.7	83.2	83.3	83.9	83.3	83.7	80.4	84.2	84	84.5	83.4	82.9	94.8	94.7	96.2	95.4	95.7	95	96.1	96.4	99.3	99.8	100	99.6	99.2
P. savastanoi pv. glycinea KN44	81.5	81.2	81.5	79.1	80.5	80.9	80.8	80.5	80.5	80.1	80	80.6	80.4	80.3	80.5	79.9	80.3	80.2	80.5	80.6	80.2	79.9	79.1	78.5	83.6	83.2	83.4	83.8	83.5	83.6	80.6	84.2	83.8	84.3	83.3	82.8	95.3	95.1	95.8	95.4	95.8	95	96	96.5	99.2	99.5	99.6	100	99.5
P. savastanoi pv. glycinea UnB647	81.4	81.1	81.4	79	80.4	80.6	80.6	80.2	80.2	80	79.8	80.5	80.3	80.1	80.4	79.8	80.3	80.2	80.3	80.7	80.2	79.7	78.9	78.5	83.5	82.9	83.1	83.5	83.3	83.3	80.3	83.9	83.4	84.1	83.2	82.5	94.6	94.3	95.5	94.8	95.3	94.4	96	96.1	98.9	99	99.2	99.5	100
P. savastanoi pv. glycinea ICMP 2189	81.1	80.9	81	78.9	80.2	80.4	80.3	80.1	79.9	79.7	79.4	80.2	80.2	79.9	80.1	79.7	80	79.9	79.9	80.3	79.8	79.2	78.8	78.5	83.1	82.6	82.8	83.2	83	83	80.2	83.5	83.2	83.9	82.9	82.5	94.3	94.1	95.4	95	95.2	94.6	95.6	96	98.7	99.4	99.5	99.3	99.1
P. savastanoi pv. glycinea Race4	81.9	81.6	81.4	79.6	81.2	81.1	81.3	80.9	80.9	80.7	80.2	81.2	81	80.7	80.7	80.4	80.9	80.8	80.9	81.2	80.8	80.3	80.1	79.5	84.2	83.6	83.8	84.3	83.8	83.9	81.2	84.3	84.2	84.8	83.9	83.4	94.6	94.6	96.1	95.4	95.6	95.2	96	96	97.8	98.3	98.3	98.3	97.9
P. savastanoi pv. glycinea Race4	81.5	81.2	81.2	79	80.7	81	80.5	80.2	80.4	79.8	79.7	80.5	80.3	80.2	80.4	79.9	80.5	80.4	80.2	80.7	80.5	79.9	79.7	78.9	83.6	82.9	83.2	83.9	83.4	83.7	80.4	83.8	83.4	83.7	83.6	82.9	94.7	94.5	96.1	95	95.4	95.1	96.1	96.2	98.2	98.2	98.5	98.4	98
P. amygdali ICMP 3918	79.4	79.1	79.3	77.2	79.2	79.5	79.1	78.9	78.5	78.3	78.2	78.3	78.1	78	79	78.4	78.8	78.8	78.8	78.8	78.9	78.7	77.9	77	82.5	82.3	82.4	82.5	82.6	82.6	79.3	82.5	82.3	82.8	83.6	83.1	80.9	80.7	80.7	80.6	81	80.5	80.9	81.3	80.9	81.2	81.6	81.2	81.4
P. amygdali pv. mellea ICMP 5711	78.9	78.6	78.7	76.9	78.6	78.8	78.5	78.5	78	77.6	77.6	77.7	77.6	77.3	78.4	77.8	78.1	78.1	78.2	78.2	78.3	78.1	77.3	76.5	81.9	81.7	81.9	81.9	82.1	82	79	81.9	81.8	82.2	82.8	82.5	80.2	80.2	80.2	80.1	80.3	80	80.2	80.7	80.4	80.7	80.9	80.6	80.7
P. amygdali pv. mori 301020	81.4	81.2	81.1	79.1	81	81.2	81	80.6	80.7	80.5	80.3	80.8	80.5	80.2	80.5	79.8	80.5	80.4	80.3	80.8	80.3	79.9	80.1	79.1	85.4	85	85.1	84.9	84.7	84.5	81.8	85.3	85.1	85.2	85.2	84.9	83.2	83.1	84	83.9	84	83.4	84.2	84.1	83.5	83.7	83.8	83.8	83.8
P. amygdali pv. mori ICMP4331	78.8	78.6	78.2	77.2	78.1	78.4	78.3	78.1	77.3	77.6	77.4	77.9	77.8	77.5	78.1	78	78.2	78.2	77.9	78.3	78.2	77.6	77.6	77.1	82.2	82	82.2	82.3	82.3	82.1	80.6	82.5	82.1	82.5	82.7	82.2	80.5	80.4	80.9	80.5	80.9	80.7	81.2	81.8	80.5	81.1	81.3	81.3	81.2
P. ficuserectae ICMP 7848T	79.2	79	79.2	77.7	78.9	79.3	79.2	79.3	78.7	78.2	78.1	78.3	78.4	78.2	78.8	78.5	78.5	78.5	78.6	78.9	78.5	78.3	78.1	77.9	82.8	82.3	82.7	82.8	82.8	82.2	80.5	82.9	82.3	82.7	83.6	83	81.6	81.5	81.8	81.8	82	81.4	82	82.2	81.6	81.9	82.2	81.9	81.6
P. caricapapayae ICMP 2855T	38.2	38.2	38	37.6	38	38.1	38.1	38.1	37.7	37.6	37.5	37.6	37.5	37.6	37.7	37.6	37.7	37.7	37.7	37.7	37.7	37.7	37.9	37.4	37.6	37.7	37.7	37.6	37.6	37.6	37	37.9	37.5	37.5	37.6	37.5	37.7	37.7	37.7	37.7	37.8	37.5	37.8	37.8	37.7	37.6	37.7	37.6	37.5
P. syringae pv. helianthi ICMP 4531	37.7	37.7	37.6	37.1	37.5	37.7	38	38	37.6	37.5	37.6	37.6	37.5	37.6	37.6	37.5	37.5	37.5	37.5	37.6	37.6	37.6	37.5	37.1	37.5	37.5	37.5	37.6	37.6	37.6	36.9	38.1	37.7	37.4	37.7	37.6	37.7	37.7	37.6	37.6	37.7	37.5	37.6	37.8	37.6	37.7	37.7	37.7	37.6
P. syringae pv. tagetis ICMP 4091	37.9	37.9	38	37.3	38.1	37.9	38.2	38.2	37.9	37.8	37.8	37.7	37.6	37.6	37.9	37.7	37.8	37.9	38	37.8	38	38.1	37.7	37.5	37.6	37.8	37.7	37.6	37.7	37.7	37	38	37.5	37.6	37.9	37.8	37.9	37.9	37.7	37.7	37.7	37.8	37.7	38	38.1	37.9	38	37.8	37.9
FORMULA 2: DDH estimate (GLM-based): 95.00% [93.4 - 96.3%] Probability that DDH > 70% (i.e., same species): 97.21% (via logistic regression) Probability that DDH > 79% (i.e., same subspecies): 72.82% (via logistic regression)
ANIb - 60 genomes	P. amygdali pv. aesculi 0893_23	P. amygdali pv. aesculi NCPPB 3681	P. amygdali pv. aesculi 2250	P. amygdali pv. aesculi ICMP 8947	P. amygdali pv. ulmi ICMP 3962	P. amygdali pv. morsprunorumFTRS_U7805	P. meliae lCFBP 3225T	P. meliae ICMP 6289T	P. amygdali pv. dendropanacis CFBP 4219	P. amygdali pv. myricaeAZ84488	P. amygdali pv. myricae ICMP 7118	P. amygdali pv. dendropanacis CFBP 3226	P. amygdali pv. dendropanacis ICMP 9150	P. amygdali CFBP 3205T	P. amygdali pv. ciccaronei ICMP 5710	P. savastanoi ICMP 16945	P. savastanoi 4352	P. savastanoi ICMP 4352T	P. savastanoi PseNe107	P. savastanoi ICMP 16943	P. savastanoi pv. savastanoi NCPPB 3335	P. savastanoi DAPPPG722	P. amygdali pv. photiniaeICMP 7840	P. amygdali pv. eriobotryaeICMP 4455	P. amygdali pv. lachrymans 107	P. amygdali pv. lachrymans 98A-744	P. amygdali pv. lachrymans YM7902	P. amygdali pv. tabaci 6605	P. amygdali pv. tabaci ICMP 2835	P. amygdali pv. tabaci yuexi-1	P. amygdali pv. lachrymans ICMP 3507	P. amygdali pv. tabaci ATCC 11528	P. amygdali pv. tabaci ATCC11528	P. amygdali pv. hibisci ICMP 9623	P. amygdali pv. sesami HC_1	P. amygdali pv. sesami ICMP 763	P. amygdali pv. melleaN6801	P. savastanoi 1302	P. savastanoi pv. phaseolicola 1448A	P. savastanoi pv. phaseolicola HB10	P. savastanoi pv. phaseolicola NPS3121	P. savastanoi pv. phaseolicola ICMP2740LJQZ01	P. savastanoi pv. phaseolicola Y5_2	P. savastanoi pv. phaseolicola 1644R	P. savastanoi pv. glycinea B076	P. savastanoi pv. glycinea BR1	P. savastanoi pv. glycinea LN10	P. savastanoi pv. glycinea KN44	P. savastanoi pv. glycinea UnB647
P. amygdali pv. aesculi 0893_23	100	99.91	99.72	99.66	99.4	98.56	98.41	98.34	98.32	98.29	98.3	98.24	98.2	98.21	98.24	98.23	98.34	98.38	98.34	98.36	98.3	98.32	98.34	98.11	97.67	97.71	97.69	97.64	97.62	97.65	97.27	97.62	97.62	97.62	97.56	97.51	97.43	97.44	97.61	97.59	97.56	97.53	97.62	97.51	97.55	97.52	97.54	97.52	97.51
P. amygdali pv. aesculi NCPPB 3681	99.94	100	99.75	99.65	99.4	98.49	98.37	98.32	98.29	98.26	98.29	98.2	98.16	98.16	98.24	98.13	98.27	98.28	98.25	98.3	98.23	98.25	98.33	98.11	97.67	97.69	97.67	97.62	97.6	97.63	97.23	97.57	97.56	97.6	97.57	97.47	97.44	97.44	97.58	97.57	97.58	97.53	97.62	97.53	97.58	97.51	97.55	97.53	97.55
P. amygdali pv. aesculi 2250	99.75	99.71	100	99.46	99.2	98.48	98.39	98.3	98.29	98.28	98.26	98.3	98.25	98.24	98.23	98.21	98.36	98.35	98.29	98.35	98.27	98.24	98.28	98.06	97.55	97.53	97.5	97.63	97.56	97.67	97.18	97.53	97.51	97.57	97.51	97.48	97.41	97.41	97.67	97.54	97.56	97.52	97.66	97.46	97.53	97.55	97.54	97.56	97.52
P. amygdali pv. aesculi ICMP 8947	99.69	99.64	99.47	100	99.18	98.34	98.16	98.13	98.06	98.07	98.08	98.02	98.02	97.98	98.02	98.02	98.1	98.12	98.1	98.09	98.04	98.07	98.11	97.96	97.45	97.45	97.47	97.4	97.38	97.47	97.12	97.44	97.38	97.35	97.35	97.3	97.22	97.23	97.35	97.35	97.37	97.33	97.39	97.34	97.34	97.34	97.36	97.34	97.35
P. amygdali pv. ulmi ICMP 3962	99.35	99.34	99.13	99.08	100	98.39	98.16	98.09	98.05	98.06	98.07	98	97.96	97.97	98	97.94	98.14	98.15	98.14	98.15	98.07	98.03	98.05	97.9	97.54	97.5	97.47	97.47	97.49	97.51	97.07	97.35	97.33	97.44	97.41	97.31	97.25	97.25	97.44	97.39	97.42	97.28	97.52	97.23	97.26	97.31	97.32	97.31	97.28
P. amygdali pv. morsprunorumFTRS_U7805	98.7	98.65	98.63	98.42	98.6	100	98.51	98.42	98.45	98.39	98.36	98.39	98.33	98.3	98.37	98.31	98.48	98.48	98.43	98.49	98.32	98.4	98.32	98.05	97.69	97.7	97.67	97.68	97.71	97.71	97.29	97.7	97.66	97.73	97.59	97.5	97.49	97.49	97.68	97.58	97.59	97.53	97.68	97.47	97.46	97.48	97.5	97.5	97.48
P. meliae lCFBP 3225T	98.63	98.64	98.68	98.36	98.56	98.69	100	99.9	98.4	98.48	98.4	98.48	98.41	98.35	98.37	98.36	98.49	98.47	98.5	98.48	98.47	98.46	98.26	98.24	97.61	97.61	97.62	97.8	97.81	97.8	97.38	97.79	97.77	97.78	97.71	97.67	97.71	97.69	97.75	97.77	97.79	97.7	97.76	97.72	97.59	97.8	97.85	97.79	97.78
P. meliae ICMP 6289T	98.57	98.54	98.56	98.32	98.44	98.53	99.87	100	98.31	98.34	98.31	98.36	98.35	98.2	98.35	98.3	98.36	98.34	98.38	98.39	98.37	98.37	98.15	98.19	97.48	97.48	97.45	97.73	97.71	97.71	97.3	97.69	97.68	97.71	97.64	97.61	97.57	97.56	97.67	97.61	97.64	97.6	97.66	97.64	97.45	97.68	97.7	97.69	97.63
P. amygdali pv. dendropanacis CFBP 4219	98.28	98.27	98.27	97.99	98.14	98.26	98.14	98.07	100	98.6	98.61	98.67	98.6	98.51	98.48	98.47	98.61	98.58	98.6	98.61	98.5	98.54	98.37	98.47	97.39	97.41	97.32	97.48	97.47	97.58	97.04	97.45	97.39	97.47	97.55	97.44	97.36	97.34	97.61	97.54	97.57	97.51	97.68	97.5	97.42	97.49	97.52	97.52	97.44
P. amygdali pv. myricaeAZ84488	98.43	98.44	98.44	98.18	98.28	98.41	98.2	98.13	98.78	100	99.89	98.81	98.74	98.58	98.66	98.57	98.69	98.68	98.66	98.71	98.58	98.62	98.54	98.54	97.45	97.46	97.44	97.66	97.68	97.68	97.25	97.72	97.67	97.6	97.58	97.51	97.61	97.61	97.69	97.64	97.64	97.61	97.65	97.58	97.61	97.64	97.68	97.6	97.61
P. amygdali pv. myricae ICMP 7118	98.37	98.34	98.36	98.1	98.23	98.29	98.19	98.1	98.78	99.8	100	98.71	98.67	98.47	98.54	98.5	98.6	98.6	98.57	98.62	98.53	98.55	98.53	98.56	97.45	97.46	97.46	97.59	97.57	97.6	97.15	97.58	97.58	97.51	97.57	97.49	97.42	97.4	97.6	97.57	97.55	97.49	97.62	97.54	97.47	97.5	97.51	97.5	97.48
P. amygdali pv. dendropanacis CFBP 3226	98.41	98.39	98.42	98.15	98.22	98.33	98.26	98.18	98.77	98.8	98.82	100	99.91	98.56	98.61	98.52	98.64	98.66	98.69	98.67	98.61	98.63	98.57	98.58	97.44	97.46	97.37	97.61	97.6	97.57	97.2	97.63	97.61	97.63	97.6	97.51	97.59	97.57	97.63	97.64	97.65	97.61	97.66	97.57	97.53	97.57	97.6	97.55	97.58
P. amygdali pv. dendropanacis ICMP 9150	98.33	98.29	98.34	98.09	98.16	98.25	98.14	98.1	98.69	98.69	98.73	99.9	100	98.49	98.55	98.48	98.59	98.6	98.62	98.61	98.53	98.56	98.5	98.54	97.34	97.36	97.25	97.54	97.51	97.53	97.16	97.53	97.51	97.53	97.51	97.41	97.47	97.47	97.57	97.55	97.55	97.52	97.57	97.48	97.45	97.46	97.49	97.45	97.5
P. amygdali CFBP 3205T	98.38	98.37	98.35	98.11	98.22	98.34	98.24	98.19	98.71	98.62	98.65	98.63	98.57	100	98.74	98.62	98.78	98.78	98.76	98.79	98.71	98.74	98.5	98.37	97.42	97.43	97.41	97.69	97.63	97.64	97.24	97.65	97.62	97.61	97.58	97.52	97.57	97.56	97.63	97.58	97.61	97.59	97.66	97.6	97.56	97.54	97.56	97.53	97.58
P. amygdali pv. ciccaronei ICMP 5710	98.32	98.29	98.23	98.04	98.14	98.2	98.12	98.09	98.54	98.5	98.52	98.57	98.55	98.56	100	99.47	99.54	99.55	99.51	99.57	99.47	99.49	98.37	98.29	97.41	97.41	97.35	97.58	97.53	97.64	97.13	97.44	97.46	97.56	97.54	97.47	97.39	97.38	97.66	97.51	97.52	97.5	97.59	97.47	97.4	97.42	97.39	97.42	97.4
P. savastanoi ICMP 16945	98.29	98.29	98.33	98.1	98.17	98.28	98.19	98.16	98.6	98.51	98.53	98.6	98.59	98.53	99.55	100	99.67	99.68	99.64	99.59	99.61	99.62	98.41	98.31	97.39	97.42	97.37	97.49	97.44	97.54	97.07	97.63	97.57	97.45	97.47	97.43	97.55	97.54	97.59	97.57	97.58	97.52	97.58	97.54	97.44	97.42	97.44	97.41	97.44
P. savastanoi 4352	98.41	98.39	98.44	98.14	98.28	98.39	98.28	98.21	98.73	98.64	98.66	98.61	98.55	98.63	99.57	99.57	100	99.97	99.87	99.7	99.7	99.92	98.45	98.32	97.51	97.54	97.5	97.66	97.67	97.68	97.21	97.7	97.68	97.63	97.57	97.51	97.62	97.61	97.66	97.62	97.62	97.62	97.58	97.63	97.52	97.53	97.52	97.5	97.51
P. savastanoi ICMP 4352T	98.34	98.34	98.36	98.08	98.24	98.32	98.2	98.15	98.68	98.54	98.56	98.58	98.53	98.57	99.53	99.52	99.91	100	99.87	99.68	99.65	99.91	98.42	98.24	97.45	97.49	97.44	97.64	97.65	97.61	97.22	97.58	97.56	97.56	97.52	97.45	97.56	97.55	97.62	97.55	97.56	97.56	97.61	97.61	97.42	97.45	97.46	97.44	97.43
P. savastanoi PseNe107	98.31	98.32	98.31	98.05	98.21	98.29	98.17	98.08	98.62	98.48	98.51	98.53	98.5	98.5	99.47	99.48	99.83	99.85	100	99.66	99.63	99.87	98.4	98.22	97.45	97.45	97.43	97.6	97.52	97.62	97.08	97.57	97.53	97.52	97.46	97.4	97.47	97.47	97.57	97.51	97.52	97.5	97.59	97.5	97.37	97.41	97.43	97.39	97.39
P. savastanoi ICMP 16943	98.38	98.37	98.43	98.1	98.31	98.45	98.31	98.25	98.74	98.7	98.75	98.71	98.64	98.65	99.62	99.55	99.76	99.79	99.79	100	99.7	99.8	98.55	98.42	97.58	97.58	97.55	97.7	97.7	97.73	97.25	97.76	97.73	97.67	97.6	97.52	97.64	97.63	97.67	97.66	97.67	97.64	97.7	97.67	97.56	97.6	97.61	97.59	97.58
P. savastanoi pv. savastanoi NCPPB 3335	98.44	98.43	98.44	98.17	98.32	98.36	98.34	98.26	98.69	98.62	98.65	98.69	98.61	98.67	99.6	99.6	99.79	99.78	99.78	99.72	100	99.77	98.48	98.26	97.57	97.55	97.53	97.65	97.64	97.68	97.2	97.73	97.67	97.62	97.57	97.53	97.62	97.61	97.7	97.63	97.64	97.64	97.67	97.6	97.54	97.52	97.52	97.51	97.5
P. savastanoi DAPPPG722	98.24	98.25	98.19	97.97	98.13	98.14	98.13	98.07	98.53	98.39	98.4	98.46	98.42	98.43	99.34	99.37	99.78	99.78	99.75	99.58	99.57	100	98.22	98.09	97.39	97.39	97.37	97.51	97.47	97.56	97.04	97.51	97.45	97.46	97.39	97.31	97.32	97.3	97.52	97.43	97.44	97.41	97.58	97.42	97.25	97.3	97.32	97.34	97.28
P. amygdali pv. photiniaeICMP 7840	98.35	98.32	98.24	98.1	98.13	98.11	98.05	97.95	98.43	98.43	98.47	98.52	98.5	98.31	98.33	98.29	98.35	98.34	98.39	98.47	98.31	98.26	100	98.28	97.42	97.43	97.42	97.39	97.31	97.39	96.96	97.33	97.28	97.38	97.31	97.27	97.16	97.16	97.42	97.32	97.33	97.32	97.45	97.31	97.25	97.22	97.23	97.25	97.21
P. amygdali pv. eriobotryaeICMP 4455	98.06	98.08	98.03	97.88	97.91	97.92	97.84	97.84	98.41	98.39	98.46	98.46	98.46	98.24	98.28	98.19	98.25	98.25	98.21	98.35	98.15	98.18	98.2	100	97.14	97.16	97.13	97.21	97.24	97.23	96.93	97.3	97.22	97.27	97.16	97.13	97.25	97.25	97.31	97.25	97.27	97.28	97.36	97.26	97.2	97.22	97.23	97.23	97.23
P. amygdali pv. lachrymans 107	97.64	97.64	97.56	97.4	97.59	97.57	97.24	97.18	97.41	97.34	97.38	97.36	97.31	97.32	97.43	97.3	97.53	97.53	97.45	97.52	97.41	97.45	97.42	97.19	100	99.81	99.78	98.6	98.59	98.5	98.16	98.61	98.58	98.45	97.93	97.89	97.64	97.63	97.78	97.75	97.75	97.68	97.83	97.74	97.77	97.81	97.82	97.79	97.77
P. amygdali pv. lachrymans 98A-744	97.74	97.74	97.58	97.48	97.57	97.62	97.35	97.28	97.47	97.38	97.43	97.43	97.39	97.38	97.52	97.4	97.62	97.62	97.56	97.6	97.51	97.54	97.43	97.23	99.82	100	99.88	98.58	98.57	98.58	98.13	98.62	98.58	98.51	97.95	97.91	97.68	97.66	97.9	97.8	97.82	97.72	97.9	97.77	97.81	97.83	97.83	97.86	97.83
P. amygdali pv. lachrymans YM7902	97.76	97.75	97.63	97.53	97.58	97.61	97.36	97.27	97.47	97.4	97.48	97.38	97.34	97.38	97.5	97.38	97.6	97.61	97.47	97.57	97.41	97.47	97.43	97.21	99.81	99.92	100	98.56	98.54	98.54	98.09	98.61	98.54	98.52	97.93	97.93	97.72	97.69	97.92	97.84	97.85	97.73	97.9	97.73	97.81	97.84	97.83	97.87	97.81
P. amygdali pv. tabaci 6605	97.56	97.57	97.56	97.29	97.53	97.49	97.34	97.29	97.46	97.47	97.46	97.4	97.35	97.36	97.48	97.28	97.54	97.55	97.5	97.5	97.38	97.44	97.26	97.2	98.54	98.5	98.46	100	99.86	99.57	99.42	99.03	99.01	98.6	98.06	98	97.8	97.79	97.84	97.85	97.88	97.74	97.79	97.66	97.66	97.68	97.69	97.68	97.66
P. amygdali pv. tabaci ICMP 2835	97.47	97.48	97.52	97.23	97.48	97.5	97.4	97.35	97.36	97.49	97.35	97.37	97.34	97.37	97.41	97.41	97.54	97.55	97.47	97.48	97.38	97.37	97.13	97.28	98.44	98.37	98.37	99.84	100	99.55	99.48	98.99	98.92	98.59	98.04	97.95	97.77	97.76	97.89	97.84	97.87	97.69	97.8	97.67	97.58	97.59	97.61	97.66	97.6
P. amygdali pv. tabaci yuexi-1	97.69	97.67	97.69	97.42	97.61	97.68	97.55	97.51	97.57	97.62	97.55	97.51	97.49	97.51	97.66	97.58	97.69	97.68	97.68	97.69	97.6	97.62	97.36	97.36	98.51	98.51	98.53	99.65	99.67	100	99.16	98.93	98.88	98.62	98.19	98.1	97.81	97.79	97.92	97.92	97.95	97.81	97.83	97.8	97.77	97.83	97.82	97.83	97.79
P. amygdali pv. lachrymans ICMP 3507	97.23	97.24	97.2	97.11	97.13	97.19	97.03	97.01	97.1	97.09	97.06	97.1	97.1	97	97.1	97.05	97.15	97.16	97.08	97.09	97.03	97.02	96.91	96.97	98.11	98.05	98.05	99.48	99.53	99.17	100	98.6	98.49	98.17	97.7	97.65	97.5	97.49	97.56	97.56	97.58	97.45	97.49	97.43	97.27	97.31	97.29	97.36	97.3
P. amygdali pv. tabaci ATCC 11528	97.44	97.44	97.45	97.2	97.38	97.53	97.31	97.27	97.35	97.47	97.34	97.38	97.35	97.32	97.41	97.4	97.55	97.54	97.52	97.53	97.46	97.43	97.17	97.27	98.43	98.38	98.35	98.95	98.94	98.76	98.41	100	99.85	98.71	98.04	98.02	97.76	97.75	97.93	97.87	97.9	97.72	97.8	97.74	97.71	97.71	97.71	97.76	97.66
P. amygdali pv. tabaci ATCC11528	97.59	97.59	97.54	97.33	97.47	97.6	97.51	97.44	97.43	97.53	97.5	97.48	97.45	97.43	97.56	97.49	97.63	97.63	97.59	97.6	97.53	97.53	97.28	97.22	98.49	98.48	98.44	99.03	99.01	98.87	98.45	99.92	100	98.77	98.07	98.06	97.83	97.81	97.93	97.89	97.93	97.8	97.85	97.77	97.85	97.86	97.86	97.87	97.83
P. amygdali pv. hibisci ICMP 9623	97.58	97.56	97.6	97.32	97.53	97.6	97.41	97.39	97.44	97.41	97.44	97.47	97.45	97.36	97.53	97.36	97.55	97.56	97.48	97.51	97.4	97.46	97.26	97.25	98.33	98.37	98.36	98.59	98.57	98.44	98.12	98.73	98.68	100	98.02	97.94	97.83	97.82	97.88	97.87	97.9	97.79	97.84	97.74	97.91	97.98	97.99	97.99	97.94
P. amygdali pv. sesami HC_1	97.53	97.53	97.58	97.3	97.45	97.51	97.48	97.42	97.5	97.54	97.5	97.52	97.48	97.37	97.55	97.45	97.58	97.57	97.51	97.59	97.48	97.47	97.34	97.31	97.93	97.94	97.88	98.1	98.09	98.13	97.63	98.13	98.06	98.14	100	99.75	97.66	97.66	97.87	97.81	97.82	97.77	97.87	97.8	97.81	97.83	97.83	97.85	97.81
P. amygdali pv. sesami ICMP 763	97.44	97.43	97.41	97.19	97.31	97.34	97.26	97.23	97.45	97.39	97.35	97.33	97.31	97.23	97.43	97.36	97.49	97.48	97.42	97.49	97.38	97.38	97.22	97.19	97.78	97.8	97.74	97.95	97.91	97.96	97.5	97.94	97.94	97.94	99.66	100	97.44	97.42	97.75	97.67	97.66	97.61	97.75	97.63	97.67	97.68	97.69	97.73	97.64
P. amygdali pv. melleaN6801	97.5	97.51	97.54	97.26	97.38	97.46	97.41	97.32	97.52	97.52	97.47	97.51	97.46	97.39	97.47	97.43	97.54	97.53	97.48	97.55	97.45	97.43	97.27	97.32	97.72	97.68	97.67	97.98	97.92	97.84	97.5	97.94	97.9	97.93	97.72	97.71	100	99.98	99.91	99.87	99.87	99.71	99.62	99.38	99.02	99.06	99.06	99.13	99.01
P. savastanoi 1302	97.48	97.48	97.49	97.22	97.36	97.47	97.4	97.33	97.49	97.53	97.47	97.54	97.5	97.39	97.42	97.45	97.56	97.55	97.53	97.56	97.5	97.43	97.31	97.32	97.73	97.71	97.71	97.97	97.93	97.84	97.54	97.99	97.93	97.94	97.76	97.71	99.99	100	99.88	99.86	99.86	99.72	99.62	99.39	99.03	99.07	99.07	99.1	99.01
P. savastanoi pv. phaseolicola 1448A	97.69	97.65	97.76	97.4	97.61	97.73	97.46	97.31	97.56	97.65	97.68	97.52	97.48	97.56	97.64	97.55	97.69	97.68	97.59	97.7	97.65	97.64	97.57	97.4	97.86	97.92	97.89	98.06	98.05	97.94	97.64	98.12	98.07	98.03	97.91	97.89	99.97	99.95	100	99.96	99.96	99.92	99.7	99.56	99.29	99.26	99.28	99.24	99.24
P. savastanoi pv. phaseolicola HB10	97.64	97.66	97.66	97.41	97.48	97.6	97.5	97.42	97.63	97.62	97.61	97.64	97.59	97.53	97.59	97.52	97.64	97.65	97.62	97.64	97.6	97.61	97.42	97.37	97.8	97.81	97.8	98.03	98	97.9	97.59	98.04	98.03	98.02	97.83	97.8	99.93	99.91	99.95	100	99.97	99.88	99.71	99.51	99.17	99.2	99.2	99.19	99.16
P. savastanoi pv. phaseolicola NPS3121	97.65	97.66	97.67	97.43	97.51	97.61	97.56	97.47	97.69	97.64	97.65	97.66	97.6	97.56	97.58	97.54	97.64	97.63	97.62	97.68	97.59	97.6	97.47	97.38	97.83	97.84	97.82	98.07	98.04	97.96	97.65	98.08	98.04	98.09	97.88	97.86	99.94	99.93	99.96	99.98	100	99.9	99.71	99.54	99.21	99.24	99.24	99.26	99.2
P. savastanoi pv. phaseolicola ICMP2740LJQZ01	97.56	97.54	97.59	97.35	97.42	97.49	97.41	97.37	97.55	97.54	97.54	97.53	97.5	97.48	97.54	97.42	97.57	97.56	97.54	97.54	97.52	97.5	97.41	97.28	97.7	97.72	97.68	97.79	97.8	97.82	97.41	97.9	97.83	97.85	97.72	97.69	99.67	99.68	99.87	99.82	99.8	100	99.63	99.39	99.07	99.09	99.06	99.09	99.02
P. savastanoi pv. phaseolicola Y5_2	97.71	97.71	97.71	97.48	97.6	97.71	97.54	97.46	97.73	97.67	97.7	97.62	97.59	97.65	97.7	97.6	97.7	97.71	97.73	97.73	97.67	97.73	97.54	97.49	97.92	97.94	97.9	98.03	98.03	97.89	97.64	98.05	98.06	98	97.96	97.93	99.69	99.69	99.76	99.75	99.77	99.73	100	99.58	99.25	99.25	99.27	99.25	99.21
P. savastanoi pv. phaseolicola 1644R	97.53	97.55	97.52	97.34	97.4	97.45	97.29	97.24	97.59	97.45	97.57	97.48	97.43	97.47	97.51	97.44	97.6	97.6	97.57	97.62	97.54	97.54	97.38	97.32	97.78	97.78	97.73	97.81	97.83	97.84	97.43	97.8	97.79	97.83	97.83	97.79	99.38	99.38	99.55	99.49	99.48	99.44	99.49	100	99.22	99.19	99.19	99.23	99.16
P. savastanoi pv. glycinea B076	97.63	97.63	97.56	97.4	97.39	97.48	97.27	97.11	97.46	97.47	97.51	97.5	97.43	97.44	97.43	97.31	97.51	97.48	97.43	97.48	97.46	97.4	97.33	97.23	97.76	97.8	97.75	97.76	97.71	97.84	97.29	97.79	97.79	97.89	97.77	97.69	98.93	98.93	99.21	99.02	99.05	99.02	99.2	99.09	100	99.86	99.85	99.83	99.81
P. savastanoi pv. glycinea BR1	97.69	97.69	97.73	97.46	97.5	97.56	97.52	97.44	97.63	97.56	97.56	97.56	97.5	97.52	97.52	97.46	97.57	97.58	97.58	97.58	97.48	97.5	97.33	97.33	97.9	97.87	97.84	97.85	97.81	97.89	97.38	97.92	97.9	98.04	97.89	97.85	99.11	99.09	99.31	99.21	99.24	99.17	99.28	99.3	99.91	100	99.97	99.91	99.84
P. savastanoi pv. glycinea LN10	97.76	97.76	97.76	97.51	97.55	97.59	97.59	97.5	97.68	97.64	97.65	97.62	97.58	97.57	97.58	97.48	97.59	97.62	97.62	97.63	97.53	97.5	97.41	97.4	97.97	97.89	97.88	97.86	97.82	97.93	97.38	97.93	97.95	98.04	97.93	97.89	99.11	99.11	99.3	99.21	99.21	99.19	99.31	99.29	99.91	99.95	100	99.93	99.83
P. savastanoi pv. glycinea KN44	97.66	97.65	97.69	97.4	97.52	97.55	97.5	97.42	97.61	97.59	97.59	97.57	97.52	97.52	97.52	97.4	97.56	97.57	97.6	97.62	97.46	97.5	97.41	97.39	97.89	97.88	97.86	97.81	97.79	97.86	97.38	97.9	97.9	98.05	97.88	97.81	99.14	99.13	99.27	99.22	99.23	99.19	99.29	99.32	99.9	99.9	99.92	100	99.89
P. savastanoi pv. glycinea UnB647	97.7	97.69	97.7	97.46	97.48	97.56	97.51	97.45	97.66	97.61	97.62	97.6	97.56	97.51	97.56	97.43	97.61	97.61	97.61	97.62	97.5	97.52	97.41	97.39	97.91	97.88	97.83	97.82	97.8	97.87	97.41	97.91	97.91	98.02	97.86	97.82	99.11	99.09	99.29	99.19	99.2	99.13	99.25	99.27	99.91	99.88	99.9	99.93	100
P. savastanoi pv. glycinea ICMP 2189	97.57	97.56	97.6	97.36	97.45	97.5	97.4	97.35	97.52	97.44	97.45	97.47	97.43	97.44	97.41	97.28	97.43	97.44	97.44	97.45	97.38	97.36	97.33	97.28	97.78	97.78	97.75	97.66	97.66	97.77	97.26	97.77	97.78	97.88	97.73	97.7	98.94	98.94	99.19	99.05	99.05	99.06	99.15	99.19	99.82	99.83	99.85	99.82	99.77
P. savastanoi pv. glycinea Race4	97.26	97.2	97.17	97.03	97.08	97.11	97.05	96.88	97.13	97.09	97.11	97.08	97.04	97.07	97.07	97.06	97.1	97.15	97.07	97.24	97.03	97.11	97.04	96.99	97.45	97.47	97.39	97.49	97.39	97.59	97.03	97.37	97.38	97.54	97.4	97.39	98.52	98.51	99.04	98.7	98.69	98.82	98.85	98.8	99.3	99.24	99.21	99.3	99.23
P. savastanoi pv. glycinea Race4	97.7	97.7	97.7	97.44	97.6	97.61	97.56	97.42	97.53	97.57	97.58	97.58	97.54	97.57	97.62	97.57	97.68	97.65	97.57	97.69	97.63	97.61	97.49	97.35	97.96	97.96	97.95	97.94	97.91	98	97.47	98	97.99	98.04	98	97.91	99.16	99.15	99.37	99.28	99.3	99.29	99.35	99.35	99.77	99.76	99.77	99.74	99.71
P. amygdali ICMP 3918	97.42	97.42	97.43	97.17	97.37	97.46	97.23	97.19	97.31	97.36	97.38	97.29	97.26	97.17	97.38	97.26	97.43	97.42	97.41	97.4	97.34	97.4	97.23	97.17	97.74	97.72	97.72	97.83	97.84	97.76	97.4	97.87	97.87	97.94	97.97	97.92	97.59	97.58	97.59	97.58	97.6	97.56	97.54	97.56	97.59	97.64	97.65	97.62	97.62
P. amygdali pv. mellea ICMP 5711	97.35	97.34	97.35	97.13	97.28	97.34	97.1	97.07	97.2	97.26	97.27	97.22	97.2	97.06	97.26	97.16	97.26	97.25	97.26	97.26	97.19	97.26	97.13	97.04	97.61	97.6	97.59	97.73	97.76	97.71	97.37	97.77	97.77	97.83	97.88	97.87	97.48	97.49	97.49	97.48	97.51	97.48	97.48	97.49	97.49	97.53	97.53	97.53	97.5
P. amygdali pv. mori 301020	97.05	97.03	97.04	96.79	96.84	97.04	96.9	96.81	96.99	96.97	97.04	96.98	96.93	96.87	97.04	96.85	96.95	97.01	96.95	96.96	96.85	96.99	96.91	96.82	97.5	97.55	97.48	97.41	97.44	97.67	97	97.65	97.65	97.46	97.59	97.61	97.13	97.14	97.41	97.34	97.32	97.3	97.43	97.34	97.21	97.2	97.17	97.22	97.11
P. amygdali pv. mori ICMP4331	97.22	97.24	97.2	97.06	97.07	97.24	97.09	97.04	97.16	97.11	97.13	97.15	97.16	97.1	97.25	97.18	97.22	97.23	97.19	97.24	97.18	97.19	97.05	97.03	97.63	97.67	97.61	97.78	97.78	97.79	97.53	97.85	97.8	97.77	97.77	97.74	97.49	97.49	97.58	97.51	97.55	97.51	97.55	97.58	97.54	97.56	97.54	97.58	97.49
P. ficuserectae ICMP 7848T	97.35	97.33	97.37	97.18	97.36	97.44	97.26	97.24	97.38	97.35	97.28	97.27	97.26	97.32	97.37	97.37	97.4	97.41	97.45	97.46	97.39	97.36	97.2	97.3	97.81	97.79	97.79	97.87	97.9	97.82	97.53	97.9	97.87	97.85	97.99	97.88	97.61	97.61	97.73	97.71	97.73	97.61	97.7	97.65	97.6	97.65	97.66	97.67	97.58
P. caricapapayae ICMP 2855T	89.12	89.14	89.14	88.93	89.04	89.05	89.05	89.03	88.93	88.89	88.91	88.94	88.91	88.82	89	88.89	88.96	88.94	88.97	88.99	88.97	88.94	89	88.77	88.94	88.96	88.95	88.85	88.91	88.89	88.56	88.96	88.88	88.83	88.93	88.88	88.89	88.88	88.91	88.92	88.94	88.87	88.95	88.84	88.85	88.85	88.84	88.86	88.83
P. syringae pv. helianthi ICMP 4531	89.03	89.04	89.11	88.82	89.14	89.06	89.08	89.06	89.02	89.09	89.11	89	88.98	88.86	89.1	88.98	89.05	89.06	89.09	89.06	89.09	89.05	88.94	88.92	88.91	88.97	88.93	89.01	89.05	89.02	88.68	89.05	89	89.08	89.1	89.1	89.01	89.02	88.97	88.98	88.98	89.04	88.96	89.05	89.09	89.05	89.05	89.02	89.02
P. syringae pv. tagetis ICMP 4091	88.94	88.95	89	88.75	88.89	88.96	89.01	88.97	88.95	88.97	89.02	88.96	88.93	88.86	88.96	88.93	88.91	88.93	88.92	88.95	88.91	88.9	88.81	88.77	88.84	88.86	88.86	88.89	88.91	88.87	88.57	89.08	89.01	88.93	89.04	89.01	89.01	89	88.96	89	89.01	88.94	88.93	88.96	88.98	88.97	89	88.98	88.95
[truncated: 11 more columns]

## Sheet: GrV_GGDC&ANIb
Supplemental Table S3. GGDC and ANIb pairwise comparisons for the phylogenomic branches. Each square indicates a phylogenomic species.
	113	114	115	116	117	118	119	120	121	122
GGDC - Formule 2 - 10 genomes	P. asturiensis LMG 26898T	P. syringae CC1417	P. syringae CC1524	P. viridiflava CDRTc14	P. viridiflava DSM 6694	P. viridiflava UASWS0038	P. viridiflava ICMP 2848T	P. viridiflava LMCA8	P. viridiflava TA043	P. viridiflava CC1582
P. asturiensis LMG 26898T	100	58.8	59	32.7	32.7	32.7	32.7	32.8	32.8	32.7
P. syringae CC1417	58.8	100	92.7	32.7	32.6	32.6	32.7	32.7	32.6	32.6
P. syringae CC1524	59	92.7	100	32.6	32.6	32.6	32.7	32.7	32.6	32.6
P. viridiflava CDRTc14	32.7	32.7	32.6	100	83.2	83.2	83.1	74.9	74.6	71.8
P. viridiflava DSM 6694	32.7	32.6	32.6	83.2	100	99.9	99.9	75.1	74.6	71.7
P. viridiflava UASWS0038	32.7	32.6	32.6	83.2	99.9	100	99.8	75.1	74.7	71.7
P. viridiflava ICMP 2848T	32.7	32.7	32.7	83.1	99.9	99.8	100	75	74.6	71.6
P. viridiflava LMCA8	32.8	32.7	32.7	74.9	75.1	75.1	75	100	76.7	73.3
P. viridiflava TA043	32.8	32.6	32.6	74.6	74.6	74.7	74.6	76.7	100	73.7
P. viridiflava CC1582	32.7	32.6	32.6	71.8	71.7	71.7	71.6	73.3	73.7	100
FORMULA 2: DDH estimate (GLM-based): 95.00% [93.4 - 96.3%] Probability that DDH > 70% (i.e., same species): 97.21% (via logistic regression) Probability that DDH > 79% (i.e., same subspecies): 72.82% (via logistic regression)
ANIb - 15 (10) genomes	P. asturiensis LMG 26898T	P. syringae CC1417	P. syringae CC1524	P. viridiflava CDRTc14	P. viridiflava DSM 6694	P. viridiflava UASWS0038	P. viridiflava ICMP 2848T	P. viridiflava LMCA8	P. viridiflava TA043	P. viridiflava CC1582	P. cichorii ATCC 10857	P. cichorii JBC1T	P. syringae UB246	P. caspiana FBF102T	Pseudomonas sp. S25
P. asturiensis LMG 26898T	100	94.55	94.5	86.57	86.57	86.56	86.57	86.56	86.6	86.59	80.96	80.96	78.26	78.28	78.16
P. syringae CC1417	94.62	100	99.05	86.66	86.63	86.62	86.62	86.64	86.69	86.64	81.03	81.03	78.34	78.2	78.19
P. syringae CC1524	94.63	99.06	100	86.68	86.66	86.66	86.67	86.61	86.63	86.68	80.98	80.98	78.44	78.3	78.35
P. viridiflava CDRTc14	86.51	86.36	86.33	100	97.97	97.96	97.97	96.83	96.97	96.57	80.98	80.97	78.39	78.43	78.33
P. viridiflava DSM 6694	86.59	86.4	86.4	98.02	100	99.97	99.97	96.86	96.93	96.5	80.98	80.99	78.44	78.41	78.4
P. viridiflava UASWS0038	86.58	86.4	86.37	98.03	99.99	100	99.97	96.86	96.94	96.51	81.03	81.03	78.46	78.41	78.42
P. viridiflava ICMP 2848T	86.56	86.39	86.37	97.98	99.94	99.92	100	96.8	96.92	96.47	81.05	81.05	78.44	78.4	78.33
P. viridiflava LMCA8	86.66	86.61	86.51	97.01	96.99	96.98	96.99	100	97.24	96.82	81.19	81.19	78.66	78.58	78.54
P. viridiflava TA043	86.59	86.47	86.38	96.94	96.9	96.88	96.89	97.01	100	96.73	81.1	81.11	78.45	78.5	78.34
P. viridiflava CC1582	86.59	86.41	86.34	96.53	96.42	96.4	96.39	96.57	96.71	100	80.93	80.94	78.5	78.44	78.19
P. cichorii ATCC 10857	80.66	80.5	80.51	80.71	80.74	80.72	80.73	80.55	80.72	80.64	100	99.99	78.78	78.77	78.6
P. cichorii JBC1T	80.71	80.59	80.59	80.85	80.9	80.84	80.89	80.67	80.82	80.7	99.94	100	78.81	78.88	78.67
P. syringae UB246	78.3	78.37	78.41	78.55	78.49	78.47	78.48	78.54	78.53	78.52	78.84	78.83	100	88.52	87.11
P. caspiana FBF102T	78.26	78.25	78.25	78.53	78.42	78.44	78.42	78.49	78.49	78.47	78.86	78.86	88.44	100	86.61
Pseudomonas sp. S25	78.16	78.21	78.22	78.38	78.31	78.32	78.31	78.36	78.3	78.25	78.56	78.56	86.93	86.63	100
